# Supplementary material for: A novel hypoxic tumor microenvironment signature for predicting the survival, progression, immune responsiveness and chemoresistance of glioblastoma: a multi-omic study
Source: Aging (Albany NY). 2020 Aug 28;12(17):17038–61. doi: 10.18632/aging.103626 (PMC7521504; doi:10.18632/aging.103626)
Supplement: Supplementary Table 1 [file aging-12-103626-s002..xlsx]

## Sheet: Supplementary Table 1
Supplementary Table 1. A total of 1694 hypoxia-related genes (HRGs) collected from the Molecular Signatures Database (MSigDB)
A2M	C16orf74	CUTC	FGB	ID1	MAPK1	ORAI3	PSMD3	SERPINE1	TGFBI	ZFP91
AASDHPPT	C17orf80	CXCL1	FGD6	ID3	MAPK14	ORC6	PSMD4	SERTAD1	TGIF1	ZGPAT
ABCB1	C18orf55	CXCL10	FGF2	IDE	MAPK7	ORMDL1	PSMD5	SERTAD2	TGM2	ZMPSTE24
ABCB6	C18orf8	CXCL12	FGF3	IDH3A	MAPK8	OSMR	PSMD6	SESN2	TH	ZMYND8
ABCF2	C19orf53	CXCL2	FHL2	IER3	MAPKAPK2	OSTF1	PSMD7	SET	THAP8	ZNF143
ABCG1	C19orf6	CXCL5	FKBP4	IFI16	MAPT	OSTM1	PSMD8	SETX	THBD	ZNF292
ACAP1	C1orf112	CXCL6	FLAD1	IFI30	2019-03-03	P4HA1	PSMD9	SFXN3	TIAM2	ZNF330
ACAP2	C1orf135	CXCR1	FLI1	IFNGR1	MARCKS	P4HA2	PSME1	SGCE	TIMM9	ZNF395
ACAT2	C1orf35	CXCR2	FLNB	IFRD1	MAT2A	P4HB	PSME2	SGK1	TIMP1	ZNF398
ACER2	C1orf51	CXCR4	FLT1	IGF2	MAZ	PA2G4	PSME3	SGPL1	TIPARP	ZNF469
ACER3	C1orf96	CYB561	FLT3LG	IGF2BP2	MBOAT2	PAFAH1B3	PSME4	SH2D1A	TIPIN	ZNF654
ACOT7	C1QBP	CYB5A	FN1	IGFBP1	MCFD2	PAIP1	PSMF1	SH3BGRL3	TK2	ZSCAN18
ACOX2	C20orf111	CYP1B1	FOS	IGFBP2	MCL1	PAK1IP1	PSMG1	SH3BP4	TLR2	ZWILCH
ACSL3	C20orf20	CYP2S1	FOSL2	IGFBP3	MCM10	PAM	PTBP1	SH3GL3	TM4SF1	ZWINT
ACSL4	C20orf27	CYP51A1	FOXD1	IGFBP4	MCM2	PARM1	PTER	SH3YL1	TM4SF19
ACSL5	C2CD2	CYR61	FOXG1	IGFBP5	MCM3	PARP1	PTGER4	SHB	TMBIM6
ACSS2	C2orf49	DAAM1	FOXO3	IGFBP7	MCM4	PARP2	PTGFRN	SHCBP1	TMEFF1
ACTC1	C3	DAP	FRRS1	IKBIP	MCM5	PBK	PTGS2	SHMT2	TMEM189
ADAM10	C3orf52	DBF4	FRZB	IKZF1	MCM6	PBXIP1	PTP4A2	SIAH2	TMEM205
ADAR	C4orf3	DCAF6	FST	IL13	MDK	PCYT1B	PTPLAD1	SIK1	TMEM30A
ADAT1	C5orf13	DCTN5	FTH1	IL13RA1	MDM2	PCYT2	PTPN12	SIK3	TMEM30B
ADD3	C6orf106	DDIT3	FTL	IL16	ME2	PDCD2	PTPRC	SIKE1	TMEM33
ADIPOR2	C7orf42	DDIT4	FUS	IL18	MED10	PDGFA	PTPRO	SIPA1	TMEM38A
ADM	C7orf68	DDR1	FUT11	IL18R1	MED6	PDGFB	PTRF	SIRPA	TMEM45A
ADORA1	C8orf4	DDX11	FXN	IL1A	MELK	PDGFC	PUS1	SIRT2	TMEM5
ADORA2B	C9orf30	DDX18	FYN	IL1RAP	MERTK	PDGFRL	PVR	SIX4	TMEM50B
AFF1	CA12	DDX19A	FZD1	IL6	MESDC1	PDK1	PVT1	SKIL	TMEM51
AFF4	CA2	DDX19B	G3BP1	IL8	MEST	PDLIM4	PWP2	SKP2	TMEM65
AGL	CA9	DDX21	G3BP2	IL9R	MET	PDLIM5	PXDN	SLA	TMPRSS11D
AGPAT2	CACNA1H	DDX23	GABBR2	ILF3	METTL11A	PDRG1	PYCRL	SLC11A2	TMSB4X
AGTRAP	CACYBP	DDX39B	GADD45A	ILVBL	METTL21B	PDSS1	PYGL	SLC12A1	TMTC3
AHNAK2	CAD	DDX3X	GADD45B	IMMP2L	METTL22	PDXP	QRSL1	SLC16A1	TNC
AIMP1	CADM1	DDX41	GADD45G	IMP3	METTL2B	PDZK1	QSOX1	SLC16A3	TNFAIP8
AIMP2	CALM1	DGCR11	GAL3ST1	IMPACT	MFGE8	PEA15	RAB14	SLC19A1	TNFSF9
AJUBA	CANX	DGCR6L	GALR2	INHA	MFN2	PECR	RAB20	SLC19A2	TNIP1
AK2	CAPG	DHCR24	GAPDH	INHBB	MGAT2	PER3	RAB35	SLC1A4	TNRC6A
AK3	CAPN1	DHCR7	GART	INPP5D	MGAT4B	PET112	RABGEF1	SLC1A5	TNS4
AK4	CAPN5	DHFR	GAS2L1	INSIG1	MIF	PEX13	RACGAP1	SLC20A1	TOE1
AKAP12	CARS	DHRS9	GBE1	INSIG2	MINK1	PEX26	RAD23B	SLC24A3	TOMM20
AKAP8	CASP6	DHX29	GCH1	IPO4	MINPP1	PFAS	RAD51	SLC25A10	TOMM22
AKT1	CAV1	DHX35	GCSH	IRF2BPL	MIR210HG	PFDN1	RAD51AP1	SLC25A15	TOMM40
ALDH1L2	CAV2	DIDO1	GDF15	IRF8	MKNK2	PFKFB3	RAD54B	SLC25A20	TOP3A
ALDH3A1	CBR3	DIXDC1	GDPD3	IRX1	MLF1	PFKFB4	RALGDS	SLC25A44	TOR3A
ALDH4A1	CBX6	DKC1	GEMIN2	IRX2	MLL5	PFKL	RAMP3	SLC27A3	TP53
ALDOA	CC2D1A	DLAT	GEMIN6	ISCU	MLLT10	PFKP	RAN	SLC29A1	TP53INP1
ALDOC	CCDC165	DLEU2	GIMAP1	ISG15	MMP1	PGAM1	RANBP1	SLC2A1	TPBG
ALKBH5	CCDC41	DMD	GIMAP7	ISG20	MMP13	PGAP1	RANGAP1	SLC2A3	TPD52L2
ALPL	CCDC56	DMP1	GINS1	IST1	MMP3	PGF	RAPGEF2	SLC30A1	TPI1
AMD1	CCDC86	DNA2	GINS2	ITGA11	MMP8	PGK1	RARS	SLC30A9	TPM1
AMDHD2	CCDC99	DNAJA1	GINS3	ITGA6	MNAT1	PGM1	RASA4	SLC35B1	TPX2
AMH	CCL19	DNAJB1P1	GJA1	ITGAE	MNS1	PGM3	RASGRP1	SLC35C1	TRA2A
AMOTL2	CCL2	DNAJC5	GK3P	ITGB4	MOAP1	PGRMC2	RASL12	SLC35E1	TRAF3IP2
AMPD2	CCNA2	DNAJC9	GLRX	ITM2A	MOGS	PHB	RB1	SLC39A14	TRAF3IP3
AMPD3	CCND1	DOCK2	GLRX2	ITPK1	MPHOSPH9	PHC2	RBCK1	SLC3A2	TRAF6
ANAPC10	CCND2	DOK4	GLT25D1	ITPR1	MPP2	PHLDA1	RBKS	SLC41A2	TRAPPC1
ANAPC16	CCND3	DOLK	GLUD2	JAG1	MRPL14	PHLDA2	RBM12	SLC5A6	TRAPPC10
ANG	CCNE1	DPCD	GLYR1	JAK2	MRPL40	PI4K2A	RBM28	SLC6A8	TRAPPC2L
ANGPT2	CCNE2	DPM2	GM2A	JMJD1C	MRPL41	PIGU	RBM3	SLC7A1	TRERF1
ANGPTL4	CCNF	DPP4	GMFB	JMJD6	MRPL46	PIK3IP1	RBPJ	SLC7A11	TRIM21
ANGPTL6	CCNG2	DPYSL2	GMNN	JUB	MRPL53	PIK3R3	RBPJL	SLC7A5	TRIM8
ANKRD1	CCNH	DPYSL4	GNA13	JUN	MRPS12	PIM1	RBX1	SLC7A6	TRIOBP
ANKRD17	CCNI	DSC2	GNPDA1	JUNB	MRPS34	PIM2	RCAN1	SLCO1B3	TRIP13
ANKRD37	CCNJL	DST	GOSR2	KBTBD2	MRPS6	PIM3	RCC2	SLCO3A1	TRMT5
ANKRD44	CCR2	DTNA	GOT2	KCMF1	MRTO4	PIN4	RCL1	SLCO4A1	TRNAU1AP
ANKRD9	CCRN4L	DTX3L	GPATCH2	KCNB1	MSMO1	PINK1	RDH14	SLIRP	TRPS1
ANKZF1	CCT3	DUSP1	GPATCH8	KCNK1	MT1A	PIP4K2B	REEP1	SLPI	TSC22D3
ANLN	CD109	DUSP14	GPD1L	KCNK2	MT2A	PJA2	RER1	SMG1	TSEN2
ANP32A	CD164	DUSP2	GPI	KCNMA1	MTCP1	PKD1	RET	SMOX	TSFM
ANP32E	CD276	DUSP3	GPN3	KCP	MTERFD1	PKM2	RFC2	SNAPC5	TSHZ1
ANPEP	CD28	DUSP4	GPR146	KCTD11	MTFP1	PKMYT1	RFC3	SNORA28	TSKU
ANXA4	CD2BP2	DYRK1B	GPR172A	KDELR2	MTHFD1	PKP2	RFC5	SNRNP40	TSLP
AOX1	CD34	DZIP3	GPR35	KDELR3	MTHFD2	PLA2G4A	RFX3	SNRPA1	TSNAX
AP2B1	CD3EAP	E4F1	GPR37	KDM2B	MTX1	PLAC8	RGPD4	SNRPD1	TSR1
AP3M2	CD44	EBNA1BP2	GPR39	KDM3A	MUC1	PLAGL2	RGS4	SNRPD3	TSTA3
APBA3	CD48	EBP	GPR56	KDM4B	MUC3B	PLAU	RGS5	SNTA1	TTC23
APEX1	CD55	EBPL	GPR87	KDM4C	MUT	PLAUR	RHBDD3	SNX10	TTLL3
APITD1	CD59	ECE1	GPRC5A	KHDRBS3	MVD	PLCD1	RHOBTB1	SNX24	TTLL4
ARHGAP15	CD79A	ECE2	GPRC5C	KIAA0020	MVK	PLEK	RHOC	SNX4	TTR
ARHGAP19	CD9	EDN1	GPRIN3	KIAA0101	MXI1	PLEKHA2	RHOF	SNX9	TUBA1B
ARHGAP8	CD93	EDN2	GPS1	KIAA0226L	MYC	PLEKHG3	RHOH	SOAT1	TUBB4B
ARHGDIA	CD99	EEF1A1	GPX3	KIAA0317	MYH9	PLIN2	RIOK1	SOBP	TUBG1
ARHGEF1	CDC20	EEF1E1	GRB10	KIAA0564	MYOD1	PLK2	RIOK3	SOCS2	TUBGCP4
ARHGEF2	CDC23	EFNA1	GRHPR	KIAA0930	NADSYN1	PLOD1	RIPK4	SOD2	TXN
ARHGEF6	CDC25B	EFNA3	GRSF1	KIAA1199	NAMPT	PLOD2	RLF	SORL1	TXNIP
ARIH2	CDC34	EGFR	GRWD1	KIAA1274	NAP1L1	PLOD3	RNASE4	SORT1	TXNL1
ARL1	CDC42	EGLN1	GSPT2	KIAA2013	NAPA	PLXNA1	RNASEH1	SOX9	TYMS
ARL6IP5	CDC42EP2	EGLN2	GSS	KIF21B	NARS	PNO1	RND1	SPAG1	UACA
ARL8B	CDC42EP3	EGLN3	GSTA1	KIF23	NARS2	PNRC1	RND3	SPAG4	UBA52
ARMC6	CDC6	EGR1	GSTA4	KIF2C	NASP	POLA2	RNF114	SPAG7	UBB
ARNT	CDC7	EHD2	GTF2E1	KIF4A	NAT10	POLD1	RNF126	SPAG9	UBC
ARPC1A	CDCA4	EHF	GTF2E2	KIF5A	NAT6	POLD2	RNF14	SPATA20	UBE2D1
ARPC3	CDCP1	EI24	GTPBP2	KLC2	NAV1	POLE2	RNF146	SPATS2L	UBE2D2
ARPC4	CDHR1	EIF1AX	GTPBP4	KLF10	NCAPD3	POLR2D	RNF19A	SPDEF	UBE2D3
ARPC5	CDK1	EIF1B	GULP1	KLF4	NCAPG2	POLR2L	RNF24	SPG21	UBE2E1
ARRB1	CDK19	EIF2AK2	GXYLT1	KLF6	NCBP2	POLR3E	RNPS1	SPINK1	UBE2H
ARRDC3	CDK8	EIF2B3	GYG1	KLF7	NCL	POLR3G	ROD1	SPOCK1	UBE2I
ARTN	CDKN1A	EIF2S1	GYPC	KLHDC1	NCLN	POLR3K	RORA	SPP1	UBE2O
ARX	CDKN1B	EIF2S2	GYS1	KLHL2	NCS1	POMT2	RP1	SPRY1	UBE2S
ASB15	CDKN1C	EIF4B	GZF1	KLHL24	NDE1	POP5	RPA1	SPRY2	UBE4B
ASCC2	CDKN2C	EIF5A	H2AFJ	KLHL36	NDRG1	POP7	RPL10	SPRYD3	UBIAD1
ASF1B	CDV3	ELF3	H2AFX	KPNA1	NDRG2	POU6F1	RPL12	SQLE	UBL7
ASNS	CEBPA	ELK1	H3F3B	KPNA2	NDUFA4L2	PPARD	RPL21	SQRDL	UCHL5
ASPH	CEBPB	ELL2	HAUS2	KPNA4	NDUFAF4	PPARGC1B	RPL22	SRA1	UFM1
ASPSCR1	CEBPD	ELMO1	HAX1	KPNB1	NDUFB8	PPAT	RPL29	SRCAP	UGCG
ATF1	CECR5	ELMO2	HBEGF	KREMEN1	NDUFS6	PPFIA4	RPL30	SRD5A3	UGP2
ATF3	CELF2	ELOB	HCFC1R1	KRT15	NECAP2	PPIA	RPL39L	SRGN	UMPS
ATF4	CENPA	ELOC	HDAC5	KRT17	NEDD4L	PPID	RPL5	SRM	UPK1A
ATF7IP	CENPF	ELOVL1	HDAC9	KRT19	NEDD9	PPIF	RPL9	SRPR	UPP1
ATG14	CENPN	ELOVL6	HEATR1	KRT7	NEFL	PPL	RPLP0	SRPX	URB1
ATG9B	CFD	EMG1	HEATR3	L1CAM	NEK1	PPME1	RPN2	SRRM2	URB2
ATIC	CH25H	EMR2	HEMGN	LAMA5	NEK4	PPP1CB	RPP25	SRRT	USP1
ATM	CHAF1A	ENG	HERPUD1	LAMB3	NEK6	PPP1R11	RPP30	SRSF1	USP19
ATP13A3	CHCHD2	ENO1	HES2	LAMC1	NETO2	PPP1R15A	RPP40	SRSF2	USP39
ATP1B1	CHEK2	ENO2	HES6	LAMC2	NFIC	PPP1R3B	RPS27A	SRSF5	USP42
ATP1B3	CHIC2	ENOSF1	HEY1	LAMP2	NFIL3	PPP1R3C	RPS27AP11	SRSF7	USP46
ATP2A3	CHKA	ENPP1	HGF	LARP4	NFKB1	PPP1R9B	RPS27L	SRSF9	USP47
ATP6V0A2	CHN2	ENPP2	HHEX	LARP6	NFKBIA	PPP2R5D	RPS3	SSH1	USP9X
ATP6V1A	CHPT1	EP300	HIC1	LARS2	NFKBIE	PPP4R1	RPS6KA5	ST3GAL4	UTP14A
ATP6V1G1	CHUK	EPAS1	HIF1A	LCORL	NIF3L1	PPRC1	RRAGD	STAMBP	UTP20
ATP7A	CIAO1	EPO	HIF1AN	LCP1	NIP7	PPT1	RRM1	STARD4	VANGL2
ATP8A1	CIDEB	EPRS	HIF3A	LDHA	NIT1	PRC1	RRM2	STAU1	VAPB
ATXN1	CISD1	EPS15	HIGD1A	LDLR	NKX3-2	PRDM2	RRP1	STBD1	VARS
ATXN2L	CITED2	ERCC6L	HIRIP3	LETM1	NLE1	PRDX5	RRP15	STC1	VEGFA
AUP1	CKAP4	ERGIC1	HIST1H2AC	LGALS1	NME1	PRDX6	RRP1B	STC2	VEGFC
B3GNT4	CKB	ERICH1	HJURP	LGALSL	NMT1	PRKCA	RRP9	STEAP3	VEZT
B4GALT2	CLDN15	ERO1L	HK1	LHX9	NMU	PRKCDBP	RRS1	STIL	VHL
BACH1	CLDN3	ERRFI1	HK2	LIMCH1	NNMT	PRKG2	RSAD1	STIP1	VIM
BAG1	CLDN4	ESPN	HLA-DOB	LIMD1	NOL11	PRMT5	RSL24D1	STK4	VLDLR
BAK1	CLEC4E	ESR1	HLA-DRB1	LIN28B	NOL12	PRMT7	RUVBL1	STMN1	VRK1
BARD1	CLK3	ETF1	HLF	LLGL1	NOL3	PRODH	RUVBL2	STOM	VWA1
BAX	CLPB	ETS1	HMBS	LMNB2	NOLC1	PRPF19	RWDD3	STOX1	WAPAL
BBX	CNIH4	EVI2A	HMG20B	LMO2	NOP16	PRPF4B	RYBP	STX3	WBP5
BCAR1	CNNM4	EVI2B	HMGA1	LMO7	NOP56	PRPS1	S100A10	STXBP2	WBSCR22
BCL10	COL12A1	EWSR1	HMGA2	LNPEP	NOP58	PRPSAP1	S100A13	SUCLG2	WDR12
BCL2	COL15A1	EXO1	HMGCL	LOC100288598	NOS2	PSEN2	S100A2	SUMO1	WDR4
BCL2L11	COL3A1	EXOSC1	HMHA1	LOC100505549	NOTCH1	PSMA1	S100A3	SUMO3	WDR54
BCOR	COL4A5	EXOSC2	HMOX1	LOC100505746	NPEPPS	PSMA2	S100A4	SYF2	WDR74
BCS1L	COL5A1	EXOSC4	HNRNPA0	LOC154761	NPTX1	PSMA3	S100A6	SYNC	WDR77
BET1L	COL7A1	EXOSC8	HNRNPA1	LOC339535	NQO1	PSMA4	S100A8	SYNE1	WHAMM
BHLHE40	COPA	F2R	HNRNPC	LOC389906	NR2F6	PSMA5	SACS	SYNPO2	WIPF2
BHLHE41	COQ2	F3	HNRNPD	LOX	NR3C1	PSMA6	SAMD4A	SYNRG	WISP1
BIK	CORO1A	FABP6	HNRNPH1	LOXL1	NRCAM	PSMA7	SAMSN1	SYT13	WISP2
BIRC3	CORO1B	FAM110C	HNRNPU	LOXL2	NRN1	PSMA8	SAP30	SYTL3	WRB
BLVRB	CORO1C	FAM117B	HNRPDL	LPCAT3	NRP2	PSMB1	SAP30BP	TAF1	WSB1
BMS1	CP	FAM136A	HOMER1	LPIN1	NSDHL	PSMB10	SAR1B	TAF1D	WSB2
BNIP3	CPD	FAM13A	HOOK2	LPL	NSL1	PSMB11	SAT1	TAF9B	WTIP
BNIP3L	CPN2	FAM162A	HOXA11-AS1	LRMP	NT5E	PSMB2	SCAF11	TAGLN	XBP1
BOP1	CPNE1	FAM189A2	HOXA4	LRP1	NUCKS1	PSMB3	SCAMP4	TANC2	XPNPEP1
BRCA1	CREBBP	FAM195B	HOXA5	LRP5	NUDT15	PSMB4	SCARB1	TARDBP	XPO5
BRD3	CRLF1	FAM57A	HOXB9	LRP8	NUDT3	PSMB5	SCARB2	TC2N	XRCC5
BRD9	CRYAB	FAM64A	HOXD9	LRRC59	NUP160	PSMB6	SCD	TCEA3	XRCC6
BRMS1	CSDE1	FAM65B	HPSE	LSM3	NUP188	PSMB7	SCLY	TCEB1	YAP1
BSG	CSE1L	FAM84A	HRAS	LSR	NUP205	PSMB8	SCNN1B	TCEB1P3	YARS
BTG1	CSF1	FAM86B1	HSF1	LSS	NUP43	PSMB9	SCYL2	TCEB2	YEATS2
BYSL	CSF3	FANCG	HSP90AA1	LXN	NUP85	PSMC1	SDC4	TEAD4	YIPF5
BZW2	CSGALNACT1	FANCI	HSP90B1	LZTR1	NUP98	PSMC2	SDCBP	TEK	YPEL1
C10orf10	CSNK1A1	FASN	HSPA12B	MAD2L1	NUPR1	PSMC3	SDF2L1	TELO2	YPEL5
C11orf31	CSNK1D	FASTKD5	HSPA1A	MAFB	NUSAP1	PSMC3IP	SEC14L2	TES	YWHAG
C11orf48	CSRNP1	FBLN5	HSPA1B	MAFF	NVL	PSMC4	SEC23IP	TF	YWHAZ
C12orf24	CSRP2	FBXO17	HSPA2	MAGT1	O3FAR1	PSMC5	SEH1L	TFAM	ZBTB20
C12orf35	CTGF	FBXO32	HSPA4	MANSC1	OAS2	PSMC6	SELENBP1	TFAP2C	ZBTB25
C12orf48	CTH	FBXO42	HSPA5	MAOA	OBSL1	PSMD1	SELRC1	TFF3	ZBTB47
C12orf5	CTNS	FBXO5	HSPD1	MAP1LC3B	ODC1	PSMD10	SEM1	TFG	ZBTB8B
C12orf52	CTPS	FBXO8	HSPH1	MAP2K3	OGDH	PSMD11	2019-09-02	TFPI2	ZC3H12A
C13orf15	CTSL1	FEN1	HYOU1	MAP2K6	OGT	PSMD12	SERBP1	TFRC	ZCCHC3
C14orf169	CTSO	FERMT1	IARS	MAP3K1	OIP5	PSMD13	SERGEF	TGFA	ZFP161
C14orf2	CTTN	FERMT2	ICAM1	MAP3K11	OLFML2A	PSMD14	SERP1	TGFB1	ZFP36
C15orf48	CUL2	FEZ1	ICAM2	MAP3K14	OPN3	PSMD2	SERPINB8	TGFB3	ZFP36L1
