# Supplementary material for: A novel hypoxic tumor microenvironment signature for predicting the survival, progression, immune responsiveness and chemoresistance of glioblastoma: a multi-omic study
Source: Aging (Albany NY). 2020 Aug 28;12(17):17038–61. doi: 10.18632/aging.103626 (PMC7521504; doi:10.18632/aging.103626)
Supplement: Supplementary Table 2 [file aging-12-103626-s001..xlsx]

## Sheet: Supplementary Table 1
Supplementary Table 2. The list of 259 GBM specific hypoxia-related genes (HRGs).
AASDHPPT
ABCF2
ACSS2
ACTC1
ADAT1
ADM
AIMP2
ALDH4A1
ALDOC
ALKBH5
AMH
ANG
ANGPTL4
ANKRD37
ANKZF1
ANLN
ANP32E
AP3M2
ARHGEF6
ARPC5
ASF1B
ATF3
ATP2A3
ATP6V0A2
BHLHE40
BLVRB
BOP1
BRCA1
BRD3
C17orf80
C1orf112
C6orf106
CA2
CA9
CAV1
CCND1
CCNG2
CCT3
CD109
CDC7
CDKN1A
CDKN1B
CENPA
CENPF
CHKA
CIAO1
CLK3
COL15A1
COL4A5
COQ2
CRYAB
CSRNP1
CTNS
CTSO
CXCL12
DDIT3
DDR1
DDX19A
DOLK
DPP4
DST
DUSP1
DUSP4
DYRK1B
EBNA1BP2
ECE1
EEF1E1
EGR1
EHD2
EIF1AX
ENO2
ENPP1
ERICH1
EWSR1
EXOSC2
EXOSC4
FAM57A
FAM86B1
FANCI
FASN
FEN1
FERMT1
GADD45A
GADD45B
GINS2
GINS3
GLYR1
GMNN
GPD1L
GRB10
GRSF1
GSTA4
GTF2E1
H2AFJ
H2AFX
HEATR3
HIF1AN
HIGD1A
HIST1H2AC
HMBS
HMOX1
HOMER1
HSPA1B
HSPA4
HSPH1
ID3
IDE
IDH3A
IER3
IKBIP
IL1A
INHA
INSIG1
KDELR3
KIF4A
KLC2
KLF10
KLF6
KLHL36
KRT15
L1CAM
LAMA5
LARS2
LETM1
LGALS1
LMO7
LOX
LPCAT3
LRP1
LSS
MAFB
MAFF
MAGT1
MAP2K6
MAP3K11
MAPKAPK2
MCM3
MCM5
MED10
MELK
MRPL46
MSMO1
MT1A
MT2A
MTHFD1
MVD
NAMPT
NAPA
NCAPD3
NDRG1
NDUFA4L2
NECAP2
NEDD4L
NEK6
NETO2
NFIL3
NFKB1
NFKBIA
NIP7
NOP56
NRP2
NUP160
NUP188
NUP85
OIP5
OLFML2A
ORC6
OSTM1
P4HA2
PBK
PDSS1
PFKFB4
PHB
PIK3IP1
PIM3
PIN4
PKMYT1
PLAGL2
PLOD1
PNO1
POLA2
POLE2
POLR2L
POLR3K
POMT2
PPARD
PPP1R15A
PPP4R1
PSEN2
PSMA4
PSMD1
PSMD9
PSME3
PSMG1
PVT1
QRSL1
RAD51AP1
RANBP1
RASGRP1
RCC2
RCL1
RFC3
RFX3
RNASE4
RNASEH1
RNF19A
RPL9
RRAGD
RRM2
RRP15
RRP1B
RRS1
RUVBL1
S100A10
SCD
SCNN1B
SEH1L
SERGEF
SIK3
SLC1A4
SLC25A20
SLC2A3
SLC30A1
SLC30A9
SLC35B1
SLC35C1
SLC3A2
SLC5A6
SLC7A5
SNRPD1
SNX4
SRSF7
TAF9B
THBD
TIMP1
TIPARP
TMEM45A
TNFSF9
TOE1
TP53
TPM1
TRIP13
TSEN2
TSNAX
TUBG1
TXNIP
TYMS
UGCG
URB2
VEGFA
VRK1
VWA1
WDR4
WSB1
ZFP36
ZMPSTE24
ZNF292
ZWILCH
ZWINT
